# Supplementary material for: Supervised classification of Preeclampsia clinical cases using datasets from MALDI-TOF-MS and machine learning tools
Source: Research Square preprint supplement (doi:10.21203/rs.3.rs-6966953/v1), 2025-07-14
Supplement: Supplementary file 1 [file 39c59d23064bf1f0e8f66686.docx]

Supporting Information

**Supervised classification of Preeclampsia clinical cases using datasets from MALDI-TOF-MS and machine learning tools**

Luisa Amezquita1, Laura Maca2, Yuly Andrea Prada*3, Claudia Colmenares-Mejía4,5 , Doris Quintero-Lesmes4, Paula Bautista-Niño4, Norma Serrano4, Enrique Mejía-Ospino3.

1Universidad Pedagógica y Tecnológica de Colombia (UPTC), Tunja, Colombia

2Universidad del Cauca, Popayán, Colombia

3Universidad Industrial de Santander. Laboratorio de Espectroscopia Atómica y Molecular (LEAM). Parque Tecnológico Guatiguara. Piedecuesta, Santander, Colombia.

4Research Centre, Fundación Cardiovascular de Colombia (FCV), Hospital Internacional de Colombia, Valle de Menzuly Km 7, Piedecuesta, Santander, Colombia

5Universidad del Valle. Escuela de Ciencias Básicas. Facultad de Salud, Posgrado en Ciencias Biomédicas, Cali, Colombia..

**Table S1.** Labels for case and control sample with the MALDI spectral data reservoir is available at <https://github.com/YAPrada/MALDI-Data-Preeclampsia>.

**Labels for case and control samples**

| **Sample ID** | **Case** |  | **Sample ID** | **Case** |
| --- | --- | --- | --- | --- |
| 1 | no |  | 84 | no |
| 2 | no |  | 85 | no |
| 3 | no |  | 86 | no |
| 4 | no |  | 87 | no |
| 5 | no |  | 88 | yes |
| 6 | no |  | 89 | no |
| 7 | no |  | 90 | no |
| 8 | no |  | 91 | no |
| 9 | no |  | 92 | yes |
| 10 | no |  | 93 | yes |
| 11 | yes |  | 94 | no |
| 12 | no |  | 95 | yes |
| 13 | no |  | 96 | no |
| 14 | no |  | 97 | yes |
| 15 | yes |  | 98 | no |
| 16 | no |  | 99 | no |
| 17 | yes |  | 100 | no |
| 18 | no |  | 101 | yes |
| 19 | yes |  | 102 | yes |
| 20 | no |  | 103 | yes |
| 21 | no |  | 104 | yes |
| 22 | no |  | 105 | yes |
| 23 | no |  | 106 | yes |
| 24 | yes |  | 107 | yes |
| 25 | yes |  | 108 | yes |
| 26 | no |  | 109 | yes |
| 27 | no |  | 110 | yes |
| 28 | no |  | 111 | yes |
| 29 | no |  | 112 | yes |
| 30 | no |  | 113 | yes |
| 31 | no |  | 114 | yes |
| 32 | no |  | 115 | yes |
| 33 | yes |  | 116 | yes |
| 34 | yes |  | 117 | no |
| 35 | no |  | 118 | yes |
| 36 | no |  | 119 | no |
| 37 | no |  | 120 | yes |
| 38 | no |  | 121 | yes |
| 39 | no |  | 122 | no |
| 40 | yes |  | 123 | no |
| 41 | yes |  | 124 | no |
| 42 | yes |  | 125 | yes |
| 43 | no |  | 126 | no |
| 44 | no |  | 127 | no |
| 45 | yes |  | 128 | no |
| 46 | yes |  | 129 | no |
| 47 | no |  | 130 | no |
| 48 | yes |  | 131 | yes |
| 49 | no |  | 132 | yes |
| 50 | yes |  | 133 | no |
| 51 | no |  | 134 | no |
| 52 | no |  | 135 | no |
| 53 | yes |  | 136 | no |
| 54 | no |  | 137 | no |
| 55 | yes |  | 138 | no |
| 56 | no |  | 139 | yes |
| 57 | yes |  | 140 | yes |
| 58 | yes |  | 141 | no |
| 59 | no |  | 142 | yes |
| 60 | no |  | 143 | no |
| 61 | no |  | 144 | yes |
| 62 | no |  | 145 | no |
| 63 | yes |  | 146 | no |
| 64 | yes |  | 147 | yes |
| 65 | no |  | 148 | yes |
| 66 | no |  | 149 | no |
| 67 | yes |  | 150 | no |
| 68 | yes |  | 151 | no |
| 69 | no |  | 152 | no |
| 70 | yes |  | 153 | yes |
| 71 | no |  | 154 | yes |
| 72 | yes |  | 155 | no |
| 73 | no |  | 156 | no |
| 74 | no |  | 157 | yes |
| 75 | yes |  | 158 | yes |
| 76 | no |  | 159 | no |
| 77 | no |  | 160 | yes |
| 78 | no |  | 161 | no |
| 79 | yes |  | 162 | yes |
| 80 | no |  | 163 | no |
| 81 | no |  | 164 | no |
| 82 | yes |  |  |  |
| 83 | no |  |  |  |

*The file form .txt of both cases and controls was labelled according to the list below, and the MALDI-TOF mass spectra acquired for each sample are attached. Data are available on: <https://github.com/YAPrada/MALDI-Data-Preeclampsia>.

*The codes are available to public access as a notebook on: <https://github.com/Lauracmaca/MODELO-PE-MALDI-TOF/blob/main/Support%20Information%20S1%205-7-2024%20.ipynb>
